# Supplementary material for: Two-dimensional nanomaterials: synthesis and applications in photothermal catalysis
Source: Royal Society of Chemistry journal article supplement (doi:10.1039/d2nr06092b), 2022-12-30
Supplement: d2nr06092b1.pdf [file d2nr06092b1.pdf]

## Supplementary Information

### Two-Dimensional Nanomaterials: Synthesis and Applications in Photothermal Catalysis

Jiafu Qu,<sup>\*a, c</sup> Songqi Li,<sup>a, c</sup> Bailing Zhong,<sup>a</sup> Zhiyuan Deng,<sup>a</sup> Yinying Shu,<sup>a</sup> Xiaogang yang,<sup>a</sup> Yahui Cai,<sup>b</sup>  
Jundie Hu,<sup>\*a</sup> Chang Ming Li<sup>\*a</sup>

<sup>a</sup> School of Materials Science and Engineering, Suzhou University of Science and Technology, Suzhou 215009, China

<sup>b</sup> College of Materials Science and Engineering, Nanjing Forestry University, No. 159 Longpan Road, Nanjing, 210037, PR China

<sup>c</sup> These authors contributed equally: Jiafu Qu, Songqi Li

\*Email: qjf@usts.edu.cn; hjd@usts.edu.cn; ecml@swu.edu.cn

**Table S1.** Comparison of the synthesis strategy of 2D nanomaterials.<sup>1</sup>

| Synthesis strategy |                           | Merits                                                                                                     | Drawbacks                                                                                                |
|--------------------|---------------------------|------------------------------------------------------------------------------------------------------------|----------------------------------------------------------------------------------------------------------|
| Top-down methods   | Mechanical exfoliation    | high crystal qualities; smooth surfaces                                                                    | low yields; smaller size; uncontrollable thickness                                                       |
|                    | Liquid exfoliation        | Low cost; high efficiency; easy versatile and scalable                                                     | time-consuming; harsh environments; extreme conditions; environmental pollution; inhomogeneous thickness |
| Bottom-up methods  | Chemical vapor deposition | large areas; high quality; large-scale preparation;                                                        | specific substrates; harsh reaction conditions; high energy consumption; high cost                       |
|                    | Wet-chemical synthesis    | Easy operation; controllable morphology and crystal size; low energy consumption; good optical performance | harsh reaction conditions; low-quality with defects                                                      |

**Table S2.** Photothermal applications of 2D nanomaterials and their composites.

| Photothermal application  | Materials                             | Temperature s (°C) | Light source                                              | Ref. |
|---------------------------|---------------------------------------|--------------------|-----------------------------------------------------------|------|
| CO <sub>2</sub> reduction | In <sub>2</sub> O <sub>3-x</sub>      | 340                | 300 W Xe lamp                                             | 2    |
|                           | Ru@FL-LDHs                            | 350                | 300 W Xe lamp (~10 Suns)                                  | 3    |
|                           | Cu <sub>2</sub> O/G                   | 250                | 300 W Xe lamp, 200 mW cm <sup>-2</sup>                    | 4    |
|                           | Pt/H <sub>x</sub> MoO <sub>3-y</sub>  | 140                | Xe lamp irradiation (λ > 450 nm)                          | 5    |
|                           | CoFe-650                              | 310                | 300 W Xe light                                            | 6    |
|                           | Ni/Nb <sub>2</sub> C                  | 402                | 300 W Xe arc lamp                                         | 7    |
| VOCs oxidation            | Au-Cu/g-C <sub>3</sub> N <sub>4</sub> | 120                | 300 W Xe lamp (λ > 420 nm)                                | 8    |
|                           | Cu-CO <sub>3</sub> O <sub>4</sub>     | 207                | Full solar spectrum with light of 834 mW cm <sup>-2</sup> | 9    |

|                               |                                                                                                           |       |                                                              |    |
|-------------------------------|-----------------------------------------------------------------------------------------------------------|-------|--------------------------------------------------------------|----|
|                               | GO/MnO <sub>x</sub>                                                                                       | 80    | 300 W xenon lamp                                             | 10 |
|                               | TiO <sub>2</sub>                                                                                          | 290   | Hg lamp                                                      | 11 |
|                               | GO/MnO <sub>x</sub> /CN                                                                                   | ~ 85  | 300 W Xe lamp                                                | 12 |
|                               | Pt-rGO-TiO <sub>2</sub>                                                                                   | 150   | IR light irradiation,<br>116 mW/cm <sup>2</sup>              | 13 |
|                               | Pt-LDH/CeO <sub>2</sub>                                                                                   | 160   | Xenon lamp, 160<br>mW/cm <sup>2</sup>                        | 14 |
|                               | Ni <sub>2</sub> P/TiO <sub>2</sub> (B)                                                                    | 90    | 300W Xe lamp                                                 | 15 |
|                               | SAAg-g-CN                                                                                                 | 55    | 300 W Xenon lamp                                             | 16 |
|                               | Mo <sub>2</sub> C/ZnIn <sub>2</sub> S <sub>4</sub>                                                        | 124.1 | 300 W Xe lamp, 100<br>mW/cm <sup>2</sup>                     | 17 |
|                               | CS@ZIS@PS                                                                                                 | 43.4  | 300 W Xenon Lamp<br>(λ > 420 nm)                             | 18 |
| H <sub>2</sub> production     | TiN-Pt                                                                                                    | ~50   | Solar-simulated light<br>(Sciencetech Light<br>Line A4-C250) | 19 |
|                               | Cu/TiO <sub>2</sub>                                                                                       | 90    | 300 W Xenon lamp<br>(full-spectrum)                          | 20 |
|                               | NiS@g-C <sub>3</sub> N <sub>4</sub>                                                                       | 56.7  | 300 W Xe lamp                                                | 21 |
|                               | d-Ti <sub>3</sub> C <sub>2</sub> membrane                                                                 | ~39   | 300 W Xe lamp                                                | 22 |
|                               | Ti <sub>3</sub> C <sub>2</sub> T <sub>x</sub> /La <sub>0.5</sub> Sr <sub>0.5</sub> CoO <sub>3</sub> (LSC) | 40    | 350 W Xe lamp (λ ><br>420 nm)                                | 23 |
|                               | BiInSe <sub>3</sub> @CF                                                                                   | 50    | Xe lamp                                                      | 24 |
| H <sub>2</sub> O purification | hierarchical graphene foam                                                                                | 114.8 | Solar simulator<br>(SAN-EI ELECTRIC<br>XES-160S1)            | 25 |
|                               | BPQDs                                                                                                     | ~55   | 808 nm laser, 1<br>W/cm <sup>2</sup>                         | 26 |

## Reference

1. S. H. Choi, S. J. Yun, Y. S. Won, C. S. Oh, S. M. Kim, K. K. Kim and Y. H. Lee, *Nat. Commun.*, 2022, **13**, 1484.
2. Y. Qi, L. Song, S. Ouyang, X. Liang, S. Ning, Q. Zhang and J. Ye, *Adv. Mater.*, 2020, **32**, e1903915.
3. J. Ren, S. Ouyang, H. Xu, X. Meng, T. Wang, D. Wang and J. Ye, *Adv. Energy Mater.*, 2017, **7**, 1601657.
4. D. Mateo, J. Albero and H. García, *Energy Environ. Sci.*, 2017, **10**, 2392-2400.

5. H. Ge, Y. Kuwahara, K. Kusu and H. Yamashita, *J. Mater. Chem. A*, 2021, **9**, 13898-13907.
6. G. Chen, R. Gao, Y. Zhao, Z. Li, G. I. N. Waterhouse, R. Shi, J. Zhao, M. Zhang, L. Shang, G. Sheng, X. Zhang, X. Wen, L. Z. Wu, C. H. Tung and T. Zhang, *Adv. Mater.*, 2018, **30**.
7. Z. Wu, C. Li, Z. Li, K. Feng, M. Cai, D. Zhang, S. Wang, M. Chu, C. Zhang, J. Shen, Z. Huang, Y. Xiao, G. A. Ozin, X. Zhang and L. He, *ACS Nano*, 2021, **15**, 5696-5705.
8. P. Li, L. Liu, W. An, H. Wang, H. Guo, Y. Liang and W. Cui, *Appl Catal B-Environ.*, 2020, **266**, 118618.
9. S. Zhao, X. Jin, P. Wu, Y. Zhao, G. Chen, Y. Li, A. Li, D. Ye and Y. Qiu, *ACS Appl. Nano Mater.*, 2020, **3**, 10454-10461.
10. Z. Wang, H. Yu, L. Zhang, L. Guo and X. Dong, *Journal of the Taiwan Institute of Chemical Engineers*, 2020, **107**, 119-128.
11. L. Ren, M. Mao, Y. Li, L. Lan, Z. Zhang and X. Zhao, *Appl Catal B-Environ.*, 2016, **198**, 303-310.
12. Z. Wang, H. Yu, Y. Xiao, L. Zhang, L. Guo, L. Zhang and X. Dong, *Chem. Eng. J.*, 2020, **394**, 125014.
13. J.-J. Li, S.-C. Cai, E.-Q. Yu, B. Weng, X. Chen, J. Chen, H.-P. Jia and Y.-J. Xu, *Appl Catal B-Environ.*, 2018, **233**, 260-271.
14. Y. Liu, M. Pei, H. Liang, X. Wu, B. Li, Z. Si and F. Kang, *ACS Appl. Mater. Interfaces*, 2022, **14**, 36633-36643.
15. X. Luo, R. Li, K. P. Homewood, X. Chen and Y. Gao, *Appl. Surf. Sci.*, 2020, **505**, 144099.
16. X. Li, S. Zhao, X. Duan, H. Zhang, S.-z. Yang, P. Zhang, S. P. Jiang, S. Liu, H. Sun and S. Wang, *Appl Catal B-Environ.*, 2021, **283**, 119660.
17. C. Du, B. Yan and G. Yang, *Nano Energy*, 2020, **76**, 105031.
18. M. Wang, G. Zhang, Z. Guan, J. Yang and Q. Li, *Small*, 2021, **17**, e2006952.
19. S. Rej, L. Mascaretti, E. Y. Santiago, O. Tomanec, Š. Kment, Z. Wang, R. Zbořil, P. Fornasiero, A. O. Govorov and A. Naldoni, *ACS Catal.*, 2020, **10**,

5261-5271.

20. R. Song, M. Liu, B. Luo, J. Geng and D. Jing, *AIChE J.*, 2020, **66**.
21. L. Lu, X. Xu, K. An, Y. Wang and F.-n. Shi, *ACS Sustain. Chem. Eng.*, 2018, **6**, 11869-11876.
22. J. Zhao, Y. Yang, C. Yang, Y. Tian, Y. Han, J. Liu, X. Yin and W. Que, *J. Mater. Chem. A*, 2018, **6**, 16196-16204.
23. D. Fan, Y. Lu, H. Zhang, H. Xu, C. Lu, Y. Tang and X. Yang, *Appl Catal B- Environ.*, 2021, **295**, 120285.
24. J. Yao and G. Yang, *J. Mater. Chem. A*, 2018, **6**, 3869-3876.
25. H. Ren, M. Tang, B. Guan, K. Wang, J. Yang, F. Wang, M. Wang, J. Shan, Z. Chen, D. Wei, H. Peng and Z. Liu, *Adv. Mater.*, 2017, **29**.
26. Z. Sun, H. Xie, S. Tang, X. F. Yu, Z. Guo, J. Shao, H. Zhang, H. Huang, H. Wang and P. K. Chu, *Angew. Chem. Int. Ed.*, 2015, **54**, 11526-11530.
